# Supplementary material for: Perioperative chemotherapy in colorectal cancer with peritoneal metastases: A global propensity score matched study
Source: PubMed Central journal article supplement (PMC9706515; doi:10.1016/j.eclinm.2022.101746), 2022-11-24
Supplement: mmc1.pdf [file mmc1.pdf]

## **Captions for supplementary material**

**Supplementary Figure S1. Covariate balance diagnostics (love plot) – Neoadjuvant propensity score matching process.**

**Supplementary Figure S2. Covariate balance diagnostics (love plot) – Adjuvant propensity score matching process.**

Supplementary Figure S1.

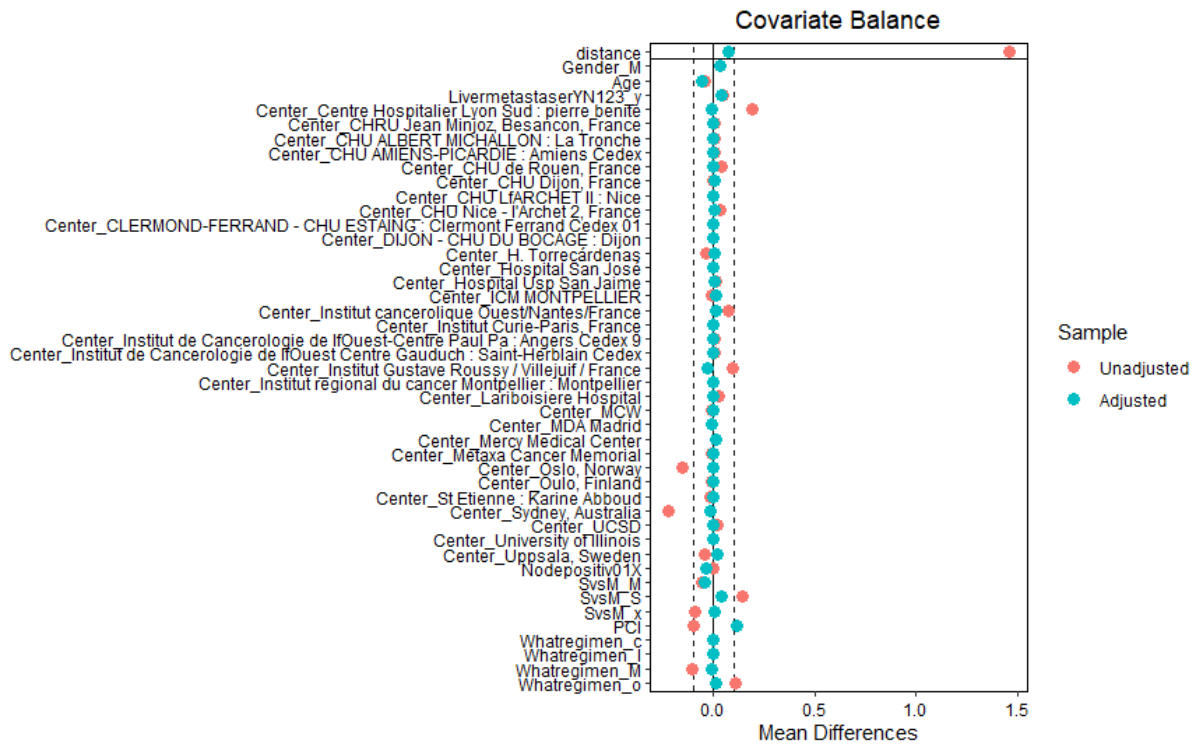

Supplementary Figure S2.

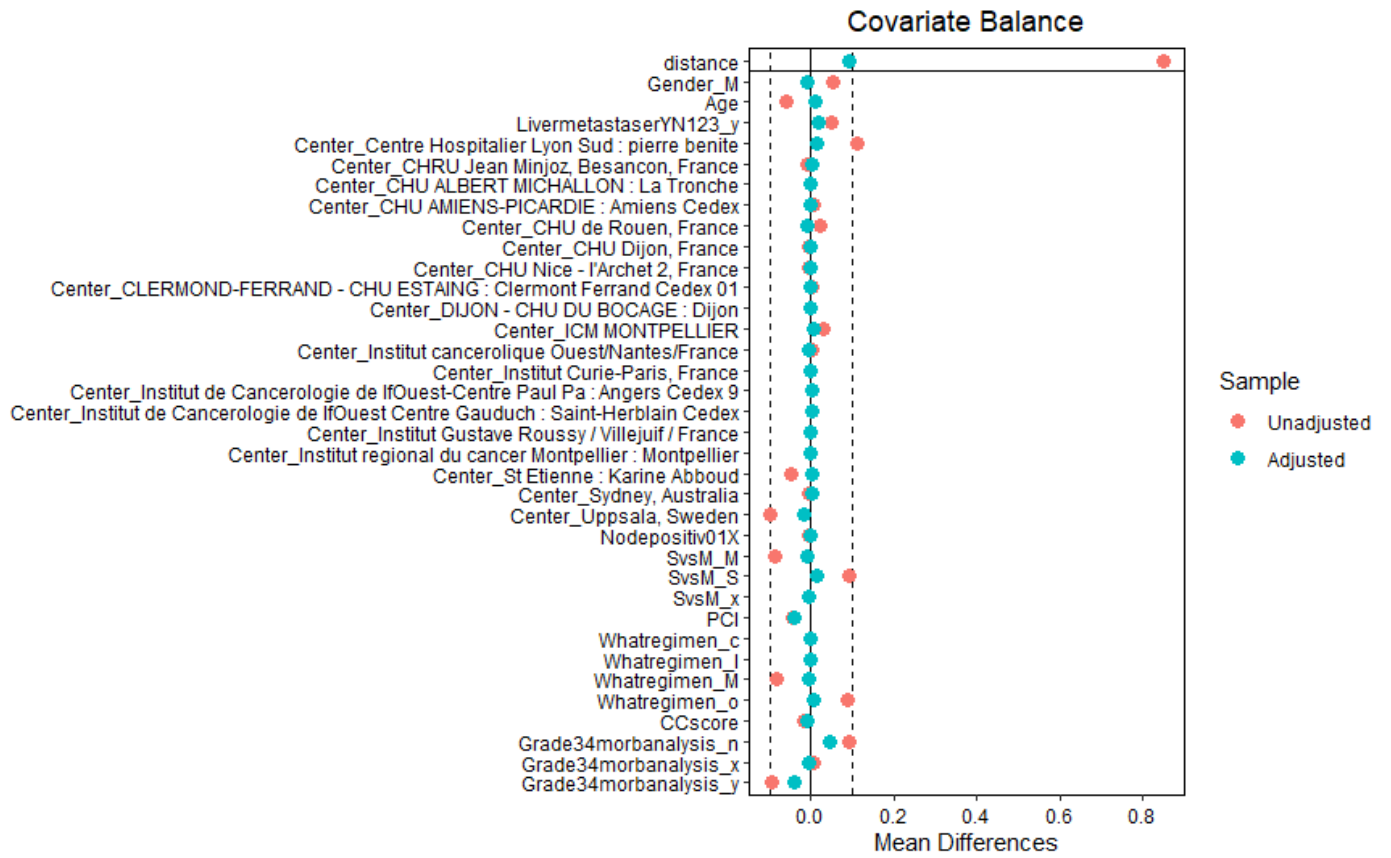

## **Supplementary methods – data capture**

### *Databases & study population*

The MitOxHIPEC study (Mitomycin C vs. Oxaliplatin Hyperthermic Intraperitoneal Chemotherapy combined with Cytoreductive Surgery for the Treatment of Colorectal Cancer with Peritoneal Metastases) was a retrospective, multi-institutional cohort study of clinical and surgical practices regarding the management of patients who underwent CRS/HIPEC for the treatment of CRC with peritoneal metastases. Data were compiled across eight countries and 39 treatment centers that were part of the Peritoneal Surface Oncology Group International (PSOGI), Nordic Peritoneal Oncology Group (NPOG), American Society for Peritoneal Surface Malignancy (ASPSM) and BIG-RENAPE Groups. Data were identified from the prospectively maintained databases of the collaborative groups and compiled in a central, standardized, de-identified and password protected database. During inputting of data into the central database, data were checked for accuracy and completeness with potential duplicate values removed by cross-referencing patients by country and treatment center, patient age, gender, date of CRS and corresponding intraoperative PCIs. Attempts to rectify missing or inconsistent data were obtained from e-mail exchanges with referral centers where possible. To ensure concordance between databases and data integrity, final data capture was audited by two of the investigators (OMF & PC) prior to analysis.

| First Name    | Last Name       | Network collaboration                                      |
|---------------|-----------------|------------------------------------------------------------|
| Kjersti       | Flatmark        | Nordic Peritoneal Oncology Group (NPOG)                    |
| Wilhelm       | Graf            | Nordic Peritoneal Oncology Group (NPOG)                    |
| Heikki        | Takala          | Nordic Peritoneal Oncology Group (NPOG)                    |
| Andrew        | Lowy            | American Society for Peritoneal Surface Malignancy (ASPSM) |
| Terence       | Chua            | American Society for Peritoneal Surface Malignancy (ASPSM) |
| Joerg         | Pelz            | American Society for Peritoneal Surface Malignancy (ASPSM) |
| Dario         | Baratti         | American Society for Peritoneal Surface Malignancy (ASPSM) |
| Joel          | Baumgartner     | American Society for Peritoneal Surface Malignancy (ASPSM) |
| Richard       | Berri           | American Society for Peritoneal Surface Malignancy (ASPSM) |
| Pedro         | Bretcha-Boix    | American Society for Peritoneal Surface Malignancy (ASPSM) |
| Marcello      | Deraco          | American Society for Peritoneal Surface Malignancy (ASPSM) |
| Guillermo     | Flores-Ayala    | American Society for Peritoneal Surface Malignancy (ASPSM) |
| Alberto       | Gomez-Portilla  | American Society for Peritoneal Surface Malignancy (ASPSM) |
| Santiago      | González-Moreno | American Society for Peritoneal Surface Malignancy (ASPSM) |
| Martin        | Goodman         | American Society for Peritoneal Surface Malignancy (ASPSM) |
| Evgenia       | Halkia          | American Society for Peritoneal Surface Malignancy (ASPSM) |
| Shigeki       | Kusamura        | American Society for Peritoneal Surface Malignancy (ASPSM) |
| Mecker        | Moller          | American Society for Peritoneal Surface Malignancy (ASPSM) |
| Guillaume     | Passot          | American Society for Peritoneal Surface Malignancy (ASPSM) |
| Marc          | Pocard          | American Society for Peritoneal Surface Malignancy (ASPSM) |
| George        | Salti           | American Society for Peritoneal Surface Malignancy (ASPSM) |
| Armando       | Sardi           | American Society for Peritoneal Surface Malignancy (ASPSM) |
| Maheswari     | Senthil         | American Society for Peritoneal Surface Malignancy (ASPSM) |
| John          | Spilioitis      | American Society for Peritoneal Surface Malignancy (ASPSM) |
| Juan          | Torres-Melero   | American Society for Peritoneal Surface Malignancy (ASPSM) |
| Kiran         | Turaga          | American Society for Peritoneal Surface Malignancy (ASPSM) |
| Jean-Marc     | Bereder         | BIG-RENAPE                                                 |
| Jean-Louis    | Bernard         | BIG-RENAPE                                                 |
| Naoual        | Bakrin          | BIG-RENAPE                                                 |
| Sébastien     | Carrère         | BIG-RENAPE                                                 |
| Julien        | Coget           | BIG-RENAPE                                                 |
| Eddy          | Cotte           | BIG-RENAPE                                                 |
| Olivier       | Facy            | BIG-RENAPE                                                 |
| Maximiliano   | Gelli           | BIG-RENAPE                                                 |
| François-Noël | Gilly           | BIG-RENAPE                                                 |
| Pablo         | Ortega-Deballon | BIG-RENAPE                                                 |
| Guillaume     | Passot          | BIG-RENAPE                                                 |
| Patrick       | Rat             | BIG-RENAPE                                                 |
| Pascal        | Rousset         | BIG-RENAPE                                                 |
| Emilie        | Thibaudeau      | BIG-RENAPE                                                 |
| Delphine      | Vaudoyer        | BIG-RENAPE                                                 |
